# Supplementary material for: Facile spraying fabrication of highly flexible and mechanically robust superhydrophobic F-SiO2@PDMS coatings for self-cleaning and drag-reduction applications
Source: Royal Society of Chemistry journal article supplement (doi:10.1039/c8nj04275f), 2018-01-01
Supplement: c8nj04275f1.pdf [file c8nj04275f1.pdf]

## Supporting Materials

### **Facile spraying fabrication of highly flexible and mechanically robust superhydrophobic F-SiO<sub>2</sub>@PDMS coatings for self-cleaning and drag-reduction applications**

Yu Wu,<sup>a</sup> Yizhou Shen,<sup>\*,a</sup> Jie Tao,<sup>\*,a,c</sup> Zhaoru He,<sup>a</sup> Yuehan Xie,<sup>a</sup> Haifeng Chen,<sup>b</sup> Mingming Jin<sup>a</sup> and Wenqing Hou<sup>a</sup>

<sup>a</sup> College of Materials Science and Technology, Nanjing University of Aeronautics and Astronautics, Nanjing 210016, P. R. China

<sup>b</sup> Department of Materials Chemistry, Qiuzhen School, Huzhou University, 759, East 2nd Road, Huzhou 313000, P. R. China

<sup>c</sup> Jiangsu Collaborative Innovation Center for Advanced Inorganic Function Composites, Nanjing Tech University, Nanjing 210016, P. R. China

\* Correspondence to taojie@nuaa.edu.cn (Prof. J. Tao)  
shenyizhou@nuaa.edu.cn (A/Prof. Y. Shen)

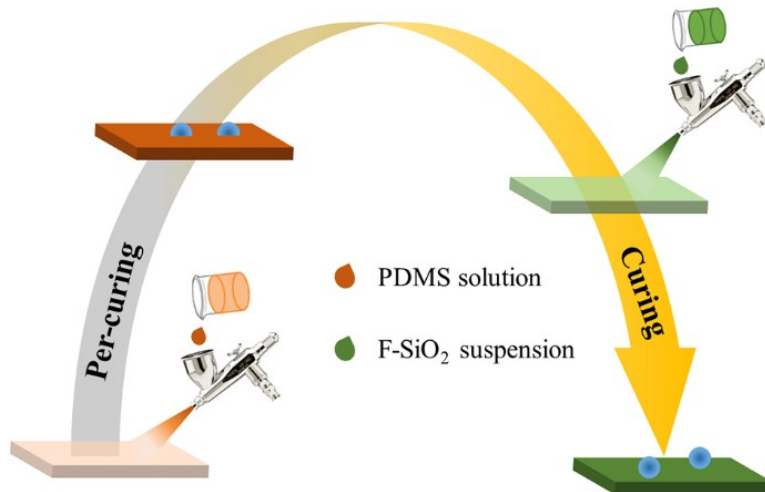

**Figure S1.** Schematic diagram of synthesizing superhydrophobic F-SiO<sub>2</sub>@PDMS coatings.

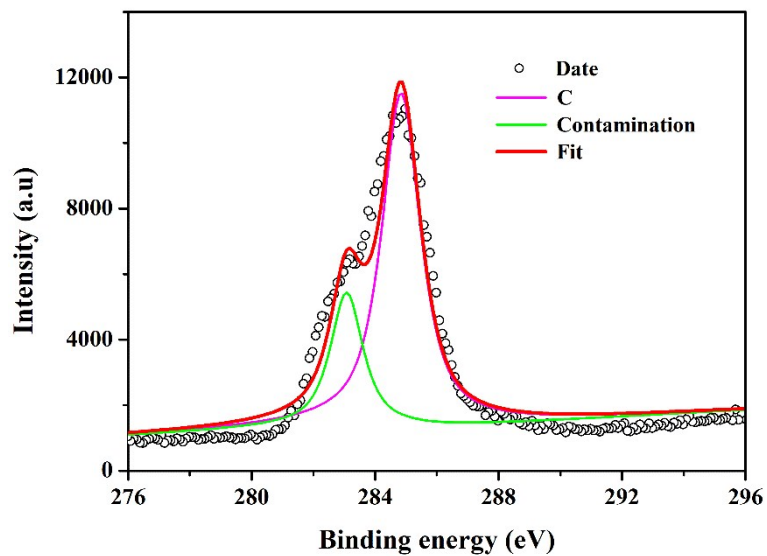

**Figure S2.** High-resolution C 1s of raw SiO<sub>2</sub> nanoparticles. The peak located at 284.8 eV corresponds to the standard C element. Also, it has been confirmed that the peak at 283.0 eV originates from the contaminant in measurement environment.

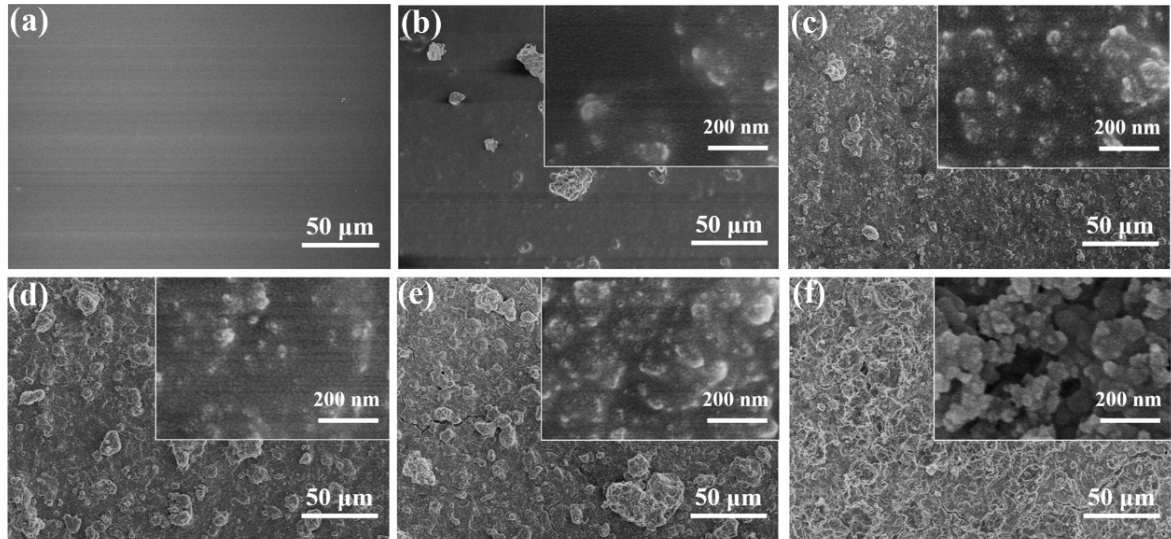

**Figure S3.** SEM images of prepared coatings with different silica content of 0, 0.22%, 0.44%, 0.66%, 0.88% and 1.76%, respectively.

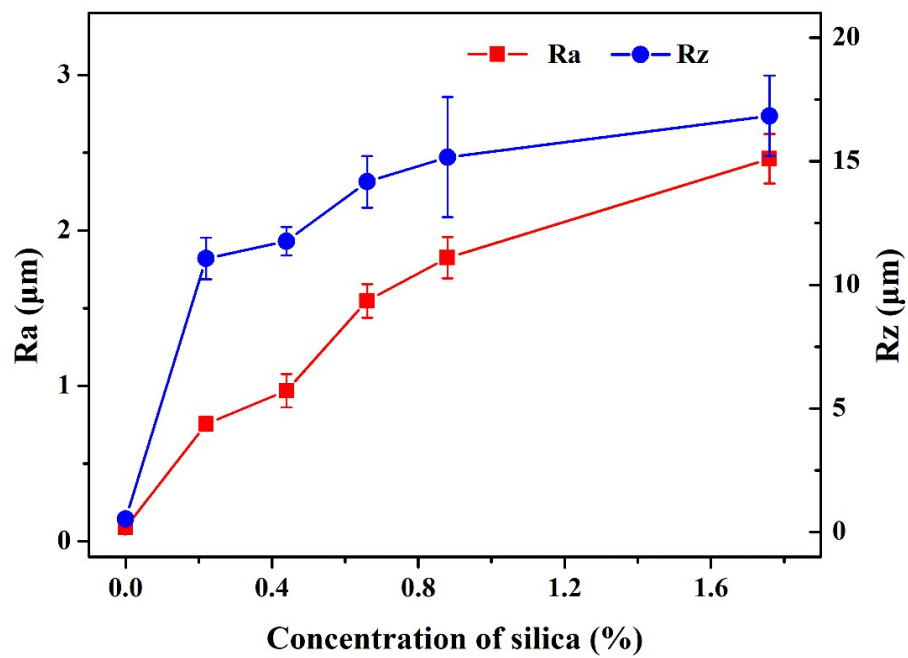

**Figure S4.** The surface roughness of prepared coatings with different silica content.

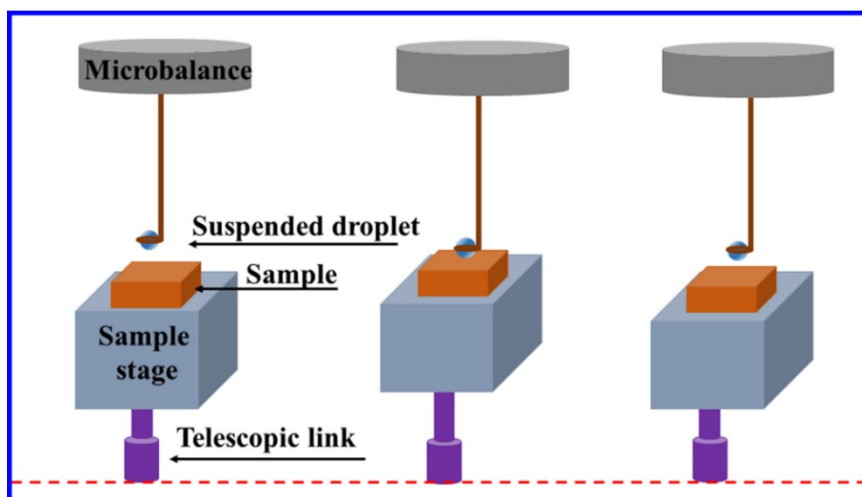

**Figure S5.** Schematic illustration of water droplet adhesion measurement system.

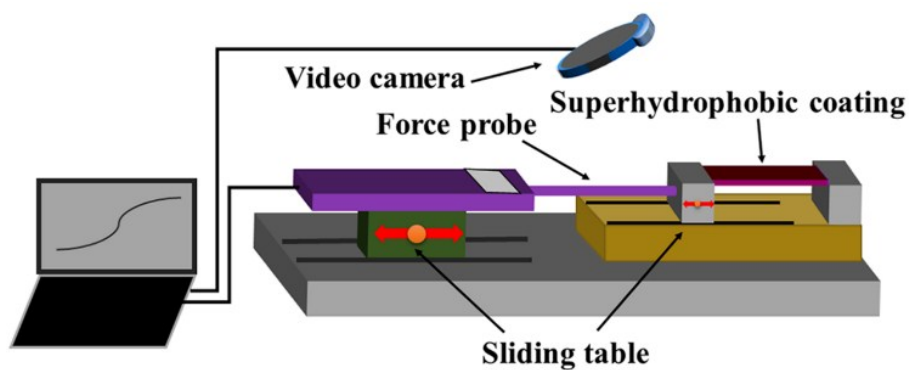

**Figure S6.** Schematic illustration of the man-made stretching setup used to characterize wettability of superhydrophobic F-SiO<sub>2</sub>@PDMS coatings after being stretched in the present study.

## Video Captions

**Video S1:** Methylene blue-dyed water dropped on the treated SiO<sub>2</sub> particles and formed liquid marbles.

**Video S2:** Droplets can easily roll off the surface.

**Video S3:** A jet of water from syringe impacted the coatings and easily bounced off the surface without leaving a trace.

**Video S4:** The dust on superhydrophobic F-SiO<sub>2</sub>@PDMS coatings can be easily taken away by continuous flow.

**Video S5:** The superhydrophobic coatings were repeatedly immersed in the dyed water, and they did not get dirty.

**Video S6:** Bare and coated “ship” were released simultaneously and moved to the finish line under tensile. It took less time for the coated one to reach the destination.

**Video S7:** The superhydrophobic coatings were stretched by 50% of its length and still sustained their water-repellent property.
